# Supplementary material for: Connect attack in IoT-WSN detect through cyclic analysis based on forward and backward elimination
Source: PeerJ Comput Sci. 2024 Jun 28;10:e2130. doi: 10.7717/peerj-cs.2130 (PMC11232611; doi:10.7717/peerj-cs.2130)
Supplement: Supplemental Information 3 [file peerj-cs-10-2130-s003.xlsx]

## Sheet: Sheet2
Before CPU Performance	After CPU performance	Before Disk Usage	Afetr Disk Usage	Before Active time	After Active time	Before Average Response Time	After Average response time	Before Read Speed	After Read speed	Before Write Speed	After Write speed	Before Wi Fi Received Packets	After WiFi Received Packets	Before GPU Usage	After GPU Usage	Before Wi fi Send Packets	After WiFi Send Packets	Before Memory Usage	After Memory Usage
70	33	5	2	1	2	2	3	2	81.1	18	4.1	8	8	21	14	8	8	43	73
78	35	3	11	5	11	6	9.5	5	20.6	15	334	16	16	18	13	24	16	40	73
84	37	4	7	3	7	8	1.1	7	9.6	14	8.2	8	0	19	4	36	8	41	73
82	34	2	1	4	0	9	1.1	9	40.4	19	158	32	32	25	3	24	0	39	72
83	38	1	6	9	5	17	1.4	4	23.5	12	140	8	8	21	5	0	8	38	72
79	42	7	5	6	9	19	1.6	6	8.4	11	239	24	24	17	8	8	8	35	72
72	47	9	2	11	6	2	1.4	1	2.7	17	69.6	8	8	22	8	16	16	45	72
71	37	8	9	13	9	26	8.3	8	3.9	31	522	16	16	26	5	24	32	48	73
75	40	11	22	12	22	24	40.4	10	4.7	34	484	24	0	29	6	32	16	47	73
77	52	18	15	4	15	28	5.2	14	22.8	25	376	8	8	28	6	16	8	44	72
86	44	19	31	8	31	27	2.8	18	67.9	29	174	32	32	27	7	16	0	45	73
89	31	13	1	7	2	26	2.3	17	10.8	35	197	24	24	16	4	0	8	41	73
88	39	15	5	7	5	21	3.8	16	2.2	27	231	8	8	18	6	24	16	48	71
83	36	12	4	5	5	26	1.2	20	5.8	38	156	16	0	17	5	32	0	45	71
84	34	14	1	3	1	23	4.6	25	25.4	31	530	32	80	19	5	8	8	47	71
85	47	16	33	11	33	27	2.7	28	30.5	33	78.1	8	8	21	6	16	24	44	69
87	59	17	11	5	11	22	2.9	26	44.9	32	64.1	24	24	24	8	0	8	41	65
91	38	2	6	8	5	31	23.6	24	31.9	29	190	32	32	26	6	16	0	33	64
95	43	9	9	7	9	35	22.5	22	32.4	27	827	16	16	22	6	8	32	31	65
93	40	8	0	9	8	28	0	20	2.7	21	0	32	0	24	6	24	0	37	65
72	43	7	38	6	38	37	88.2	21	2.9	22	529	8	8	23	6	32	16	38	65
76	41	6	5	3	5	19	1.9	23	1.8	37	213	24	24	27	6	16	24	32	65
71	38	5	8	1	6	18	1.5	28	2.1	39	201	16	16	24	5	8	8	33	67
74	37	4	11	2	11	27	11	22	41.2	45	450	32	32	26	5	24	16	43	67
79	39	6	9	3	7	26	0.9	16	23.5	49	173	8	0	28	6	32	0	45	67
80	55	2	12	8	12	35	10.5	19	32.7	48	110	24	80	27	11	0	40	47	67
86	39	19	7	9	5	34	2.1	14	5.6	58	296	16	16	24	7	16	8	41	67
89	41	15	71	5	71	36	67.6	15	65.8	57	16.4	8	8	21	5	8	8	49	65
95	40	11	8	6	5	34	1.9	19	61.8	68	205	8	24	20	6	24	0	41	67
98	47	17	2	1	2	33	1.2	21	65.9	72	40.8	16	16	19	8	32	16	43	68

## Sheet: Sheet1
CPU Usage	Memory usage	Disk usage	Wi Fi send packets	Wi Fi received packets	GPU usage	Active time	Attack
70	43	5	8	8	21	1	0			CPU vs Wifi send packets	0.0266		CPU vs Wifi send packets	0.0266
78	40	3	24	16	18	5	0			CPU VS Memory	0		CPU VS Memory	0
84	41	4	36	8	19	3	0			CPU Vs Disk	0.8858		CPU Vs GPU	0
82	39	2	24	32	25	4	0			CPU Vs GPU	0
83	38	1	0	8	21	9	0			CPU vs wifi rec pack	0.9766		memory vs cpu	0
79	35	7	8	24	17	6	0			CPU vs active time	0.1086		memry vs GPU	0
72	45	9	16	8	22	11	0
71	48	8	24	16	26	13	0			memory vs active time	0.0673		disk vs active time	0
75	47	11	32	24	29	12	0			memory vs cpu	0
77	44	18	16	8	28	4	0			memeory vs disk	0.4502		wi fi send pack Vs cpu	0.0266
86	45	19	16	32	27	8	0			memroy vs wifi send packets	0.0764		wi fi send pack vs GPU	0.0225
89	41	13	0	24	16	7	0			memoryvs wifi received pac	0.9989
88	48	15	24	8	18	7	0			memry vs GPU	0		GPU vs cpu	0
83	45	12	32	16	17	5	0			memory vs active time	0.0673		GPU vs memory	0
84	47	14	8	32	19	3	0						GPU vs Wi fi send pack	0.0225
85	44	16	16	8	21	11	0			disk vs cpu	0.8858
87	41	17	0	24	24	5	0			disk vs memory	0.4502		Active time vs disk	0
91	33	2	16	32	26	8	0			disk vs wi fi send packets	0.8963
95	31	9	8	16	22	7	0			disk vs wi fi rec packets	0.3033		GPU vs cpu	0
93	37	8	24	32	24	9	0			disk vs GPU	0.3562		GPU vs memory	0
72	38	7	32	8	23	6	0			disk vs active time	0		GPU vs Wi fi send pack	0.0225
76	32	6	16	24	27	3	0						GPU vs Active time	0.0485
71	33	5	8	16	24	1	0			wi fi send pack Vs cpu	0.0266
74	43	4	24	32	26	2	0			wi fi send pack vs active	0.8297		GPU vs Wi fi send pack	0.0225
79	45	6	32	8	28	3	0			wi fi send pack vs memory	0.0764		active time vs GPU	0.0485
80	47	2	0	24	27	8	0			wi fi send pack vs rec pack	0.4694
86	41	19	16	16	24	9	0			wi fi send pack vs GPU	0.0225
89	49	15	8	8	21	5	0			wi fi send pack vs active	0.8297
95	41	11	24	8	20	6	0
98	43	17	32	16	19	1	0			wi fi rec pack vs cpu usage	0.9766
33	73	2	8	8	14	2	1			wi fi rec pack vs memory	0.9989
35	73	11	16	16	13	11	1			wi fi rec pack vs disk	0.3033
37	73	7	8	0	4	7	1			wi fi rec pack vs wi fi send pack	0.4694
34	72	1	0	32	3	0	1			wi fi rec pack vs GPU	0.8672
38	72	6	8	8	5	5	1			wi fi rec pack vs active time	0.3109
42	72	5	8	24	8	9	1
47	72	2	16	8	8	6	1			GPU vs cpu	0
37	73	9	32	16	5	9	1			GPU vs memory	0
40	73	22	16	0	6	22	1			GPU vs Disk	0.3562
52	72	15	8	8	6	15	1			GPU vs Wi fi send pack	0.0225
44	73	31	0	32	7	31	1			GPU vs wi fi rec pack	0.8672
31	73	1	8	24	4	2	1			GPU vs Active time	0.0485
39	71	5	16	8	6	5	1
36	71	4	0	0	5	5	1			Active time vs cpu	0.1086
34	71	1	8	80	5	1	1			Active time vs memory	0.0673
47	69	33	24	8	6	33	1			GPU vs Wi fi send pack	0.0225
59	65	11	8	24	8	11	1			active time vs wi fi send pack	0.8297
38	64	6	0	32	6	5	1			active time vs wi fi rec pack	0.3109
43	65	9	32	16	6	9	1			active time vs GPU	0.0485
40	65	0	0	0	6	8	1
43	65	38	16	8	6	38	1
41	65	5	24	24	6	5	1
38	67	8	8	16	5	6	1
37	67	11	16	32	5	11	1
39	67	9	0	0	6	7	1
55	67	12	40	80	11	12	1
39	67	7	8	16	7	5	1
41	65	71	8	8	5	71	1
40	67	8	0	24	6	5	1
47	68	2	16	16	8	2	1

## Sheet: Sheet3
CPU Usage	Memory usage	Disk usage	Wi Fi send packets	GPU usage	Active time
70	43	5	8	21	1
78	40	3	24	18	5
84	41	4	36	19	3
82	39	2	24	25	4
83	38	1	0	21	9
79	35	7	8	17	6
72	45	9	16	22	11
71	48	8	24	26	13
75	47	11	32	29	12
77	44	18	16	28	4
86	45	19	16	27	8
89	41	13	0	16	7
88	48	15	24	18	7
83	45	12	32	17	5
84	47	14	8	19	3
85	44	16	16	21	11
87	41	17	0	24	5
91	33	2	16	26	8
95	31	9	8	22	7
93	37	8	24	24	9
72	38	7	32	23	6
76	32	6	16	27	3
71	33	5	8	24	1
74	43	4	24	26	2
79	45	6	32	28	3
80	47	2	0	27	8
86	41	19	16	24	9
89	49	15	8	21	5
95	41	11	24	20	6
98	43	17	32	19	1
33	73	2	8	14	2
35	73	11	16	13	11
37	73	7	8	4	7
34	72	1	0	3	0
38	72	6	8	5	5
42	72	5	8	8	9		cpu vs memory	0
47	72	2	16	8	6		cpu vs disk	0.8858
37	73	9	32	5	9		cpu vs wi fi	0.0266
40	73	22	16	6	22			0
52	72	15	8	6	15
44	73	31	0	7	31
31	73	1	8	4	2
39	71	5	16	6	5
36	71	4	0	5	5
34	71	1	8	5	1
47	69	33	24	6	33
59	65	11	8	8	11
38	64	6	0	6	5
43	65	9	32	6	9
40	65	0	0	6	8
43	65	38	16	6	38
41	65	5	24	6	5
38	67	8	8	5	6
37	67	11	16	5	11
39	67	9	0	6	7
55	67	12	40	11	12
39	67	7	8	7	5
41	65	71	8	5	71
40	67	8	0	6	5
47	68	2	16	8	2
